# Supplementary material for: Geminate labels programmed by two-tone microdroplets combining structural and fluorescent color
Source: PubMed Central journal article supplement (PMC7846849; doi:10.1038/s41467-021-20908-y), 2021-01-29
Supplement: 41467_2021_20908_MOESM2_ESM.pdf [file 41467_2021_20908_MOESM2_ESM.pdf]

## **Description of Additional Supplementary Files**

File Name: Supplementary Movie 1

Description: The microfluidic fabrication of the FLC microdroplets under white light and upon UV irradiation. The movie is taken by a digital camera mounted at an optical microscope in transmission mode.

File Name: Supplementary Movie 2

Description: The fluorescent QR code is decrypted by a smartphone upon UV irradiation.

File Name: Supplementary Movie 3

Description: The fluorescent QR code on the computer screen is decrypted by different smartphones.
